# Supplementary material for: Practical Models of Pharmaceutical Care for Improving Tuberculosis Patient Detection and Treatment Outcomes: A Systematic Scoping Review
Source: MDPI journal article supplement (doi:10.3390/tropicalmed8050287), 2023-05-20
Supplement: s1 [file s1]

## *Supplementary Material*

**Supplementary File S1.** The key terms for the search strategy in the Pubmed and Cochrane databases

Pubmed:

(((((("Pharmacy"[Mesh]) OR "Pharmacies"[Mesh]) OR "Pharmacy Service, Hospital"[Mesh]) OR "Pharmacy Technicians"[Mesh]) OR "Community Pharmacy Services"[Mesh]) OR ( "Pharmacy Research"[Mesh] OR "Pharmaceutical Services, Online"[Mesh] OR "Pharmaceutical Services"[Mesh] )) AND (("Tuberculosis"[Mesh]) OR ( "Latent Tuberculosis"[Mesh] OR "Tuberculosis, Multidrug-Resistant"[Mesh] ))).

Cochrane Library:

| Search Code | Key terms                                      | Total article identified |
|-------------|------------------------------------------------|--------------------------|
| #1          | [Pharmacies] in all MeSH products              | 131                      |
| #2          | [Pharmacy Service, Hospital] explode all trees | 158                      |
| #3          | [Pharmacists] explode all trees                | 727                      |
| #4          | [Pharmacy Technicians] explode all trees       | 21                       |
| #5          | [Pharmaceutical Services] explode all trees    | 1931                     |
| #6          | [Tuberculosis] explode all trees               | 2621                     |
| #7          | [Latent Tuberculosis] explode all trees        | 141                      |
| #8          | #1 OR #2 OR #3 OR #4 OR #5                     | 2353                     |
| #9          | #6 OR #7                                       | 2621                     |
| #10         | #8 AND #9                                      | 10                       |
